# Supplementary material for: Efficient base editing for multiple genes and loci in pigs using base editors
Source: PubMed Central journal article supplement (PMC6599043; doi:10.1038/s41467-019-10421-8), 2019-06-28
Supplement: 41467_2019_10421_MOESM1_ESM.pdf [file 41467_2019_10421_MOESM1_ESM.pdf]

**Efficient base editing for multiple genes/loci in pigs using base editors**

**Supplementary Information**

**Xie *et al.* 2019**

# Supplementary Fig. 1

**a**

*DMD* 5' -TTTTTTTATCTTTCAGGTGCTTCAAGACCTAGAGCAGGAACAAGTCAGGGTCAATTC-3' **Wild-type**  
*DTL-E4*: 5' -TTTTTTTATCTTTCAGGTGCTTTAGGAAGACCTAGAGCAGGAACAAGTCAGGGTCAATTC-3' (13/20) (Q493STOP)  
*DTL-E11*: 5' -TTTTTTTATCTTTCAGGTGCTTTAGGAAGACCTAGAGCAGGAACAAGTCAGGGTCAATTC-3' (6/20) (Q493STOP)

*TYR* 5' -GAGGTGATGGGAGTCCCTGTGGCCAGCTCTCAGGCAGGGTTCCCTGTCAGGACATCATTTC-3' **Wild-type**  
*DTL-E4*: 5' -GAGGTGATGGGAGTCCCTGTGGTTAGCTCTCAGGCAGGGTTCCCTGTCAGGACATCATTTC-3' (13/20) (G27G, Q28STOP)  
5' -GAGGTGATGGGAGTCCCTGGACAGCTCTTAGGCAGGGTTCCCTGTCAGGACATCATTTC-3' (7/20) (G27G, S30L)  
*DTL-E11*: 5' -GAGGTGATGGGAGTCCCTGTGGTTAGCTCTCAGGCAGGGTTCCCTGTCAGGACATCATTTC-3' (10/20) (G27G, Q28STOP)

*LMNA* 5' -AGCAGCTCGGGAGCCAGGTGGCCGGATCCATCTCCTCTGGCTCCTCCGCCCTCCAGTGTC-3' **Wild-type**  
*DTL-E4*: 5' -AGCAGCTCGGGAGCCAGGTGGATCCATCTCCTCTGGCTCCTCCGCCTCCAGTGTC-3' (4/20) (G608G)  
5' -AGCAGCTCGGGAGCCAGGTGGATCCATCTCCTCTGGCTCCTCCGCCTCCAGTGTC-3' (4/20) (G608G, S610F)  
*DTL-E11*: 5' -AGCAGCTCGGGAGCCAGGTGGATCCATCTCCTCTGGCTCCTCCGCCTCCAGTGTC-3' (20/20) (G608G)

**b**

*RAG1* 5' -AGGGGAAACCCTCGCTGGAGCAATCTCCAGCAGTCTGGACAAGCCTGGTGGTCAGAAG-3' **Wild-type**  
*R12I-E3*: 5' -AGGGGAAACCCTCGCTGGAGTAAATCTCCAGCAGTCTGGACAAGCCTGGTGGTCAGAAG-3' (5/20) (Q61STOP)  
*R12I-E17*: 5' -AGGGGAAACCCTCGCTGGAGTAAATCTCCAGCAGTCTGGACAAGCCTGGTGGTCAGAAG-3' (8/20) (Q61STOP)  
5' -AGGGGAAACCCTCGCTGGAGTAAATTCCAGCAGTCTGGACAAGCCTGGTGGTCAGAAG-3' (3/20) (Q61STOP, S62F)

*RAG2* 5' -CCCAGTGTGAGAAAATGTCACTACAGATGATAACAGTTGGTAATAACATGGCCTTAATT-3' **Wild-type**  
*R12I-E3*: 5' -CCCAGTGTGAGAAAATGTACTATAGATGATAACAGTTGGTAATAACATGGCCTTAATT-3' (3/20) (S2L, Q4STOP)  
*R12I-E17*: 5' -CCCAGTGTGAGAAAATGTCATATAGATGATAACAGTTGGTAATAACATGGCCTTAATT-3' (10/20) (Q4STOP)  
5' -CCCAGTGTGAGAAAATGTATTATAGATGATAACAGTTGGTAATAACATGGCCTTAATT-3' (10/20) (S2L, L3L, Q4STOP)

*IL2RG* 5' -CTACCAAACATTTGTTGTCCAGCTCCAGGACCCACGGAACCCAGGAGGCAGGACCCAC-3' **Wild-type**  
*R12I-E4*: 5' -CTACCAAACATTTGTTGTTAGCTTTAGGACCCACGGGAACCCAGGAGGCAGGACCCAC-3' (4/20) (V154V, Q155STOP, L156L, Q157STOP)  
*R12I-E17*: 5' -CTACCAAACATTTGTTGTTAGCTCCAGGACCCACGGGAACCCAGGAGGCAGGACCCAC-3' (15/20) (V154V, Q155STOP)  
5' -CTACCAAACATTTGTTGTTAGTTCCAGGACCCACGGGAACCCAGGAGGCAGGACCCAC-3' (5/20) (V154V, Q155STOP, C156F)

**Supplementary Fig. 1 Simultaneous base editing of *DMD*, *TYR* and *LMNA*, or *RAG1*, *RAG2* and *IL2RG* in porcine embryos. a and b T-cloning and Sanger sequencing to detect base editing of DTL-E4, E17 (a), and R12I-E3, E17 (b). The sequences of sgRNAs are marked in yellow and the PAM sites sequences are labeled in green. The targeted sequence is underlined.**

## Supplementary Fig. 2

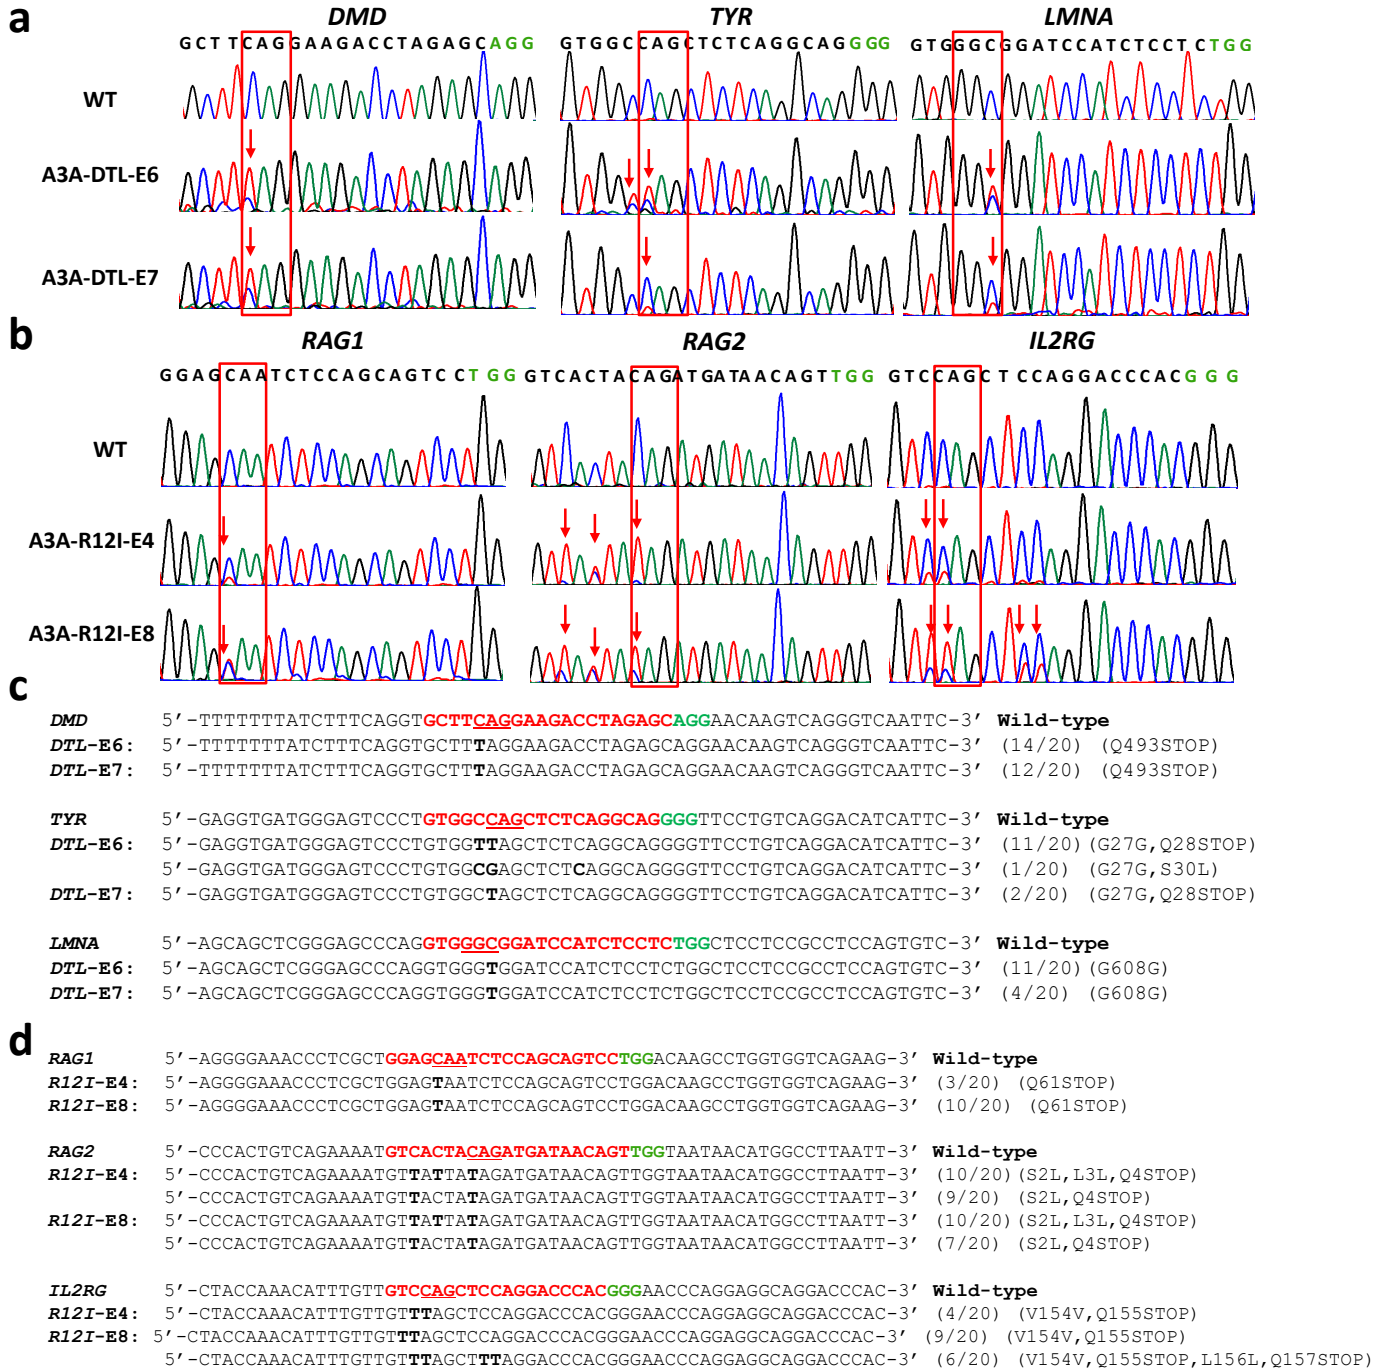

**e**

| No. of embryos injected | No. of blastocysts (%) | No. of blastocysts detected | No. of blastocysts with single gene base editing (%) |             |              | No. of blastocysts with two genes base editing (%) |                              |                              | No. of blastocysts with three genes base editing (%) |
|-------------------------|------------------------|-----------------------------|------------------------------------------------------|-------------|--------------|----------------------------------------------------|------------------------------|------------------------------|------------------------------------------------------|
|                         |                        |                             | <i>DMD</i>                                           | <i>TYR</i>  | <i>LMNA</i>  | <i>DMD</i> and <i>TYR</i>                          | <i>TYR</i> and <i>LMNA</i>   | <i>DMD</i> and <i>LMNA</i>   |                                                      |
| 100                     | 20 (24)                | 10                          | 0                                                    | 0           | 0            | 1 (10.0)                                           | 0                            | 2 (20.0)                     | 5 (50.0)                                             |
|                         |                        |                             | <i>RAG1</i>                                          | <i>RAG2</i> | <i>IL2RG</i> | <i>RAG1</i> and <i>RAG2</i>                        | <i>RAG1</i> and <i>IL2RG</i> | <i>RAG2</i> and <i>IL2RG</i> | <i>RAG1, RAG2</i> and <i>IL2RG</i>                   |
| 100                     | 25 (25)                | 12                          | 1 (8.3%)                                             | 0           | 1 (8.3%)     | 1 (8.3%)                                           | 0                            | 1 (8.3%)                     | 5 (41.7)                                             |

**Supplementary Fig. 2 hA3A-BE3-mediated multiple genes base editing in porcine embryos. a** and **b** Sanger sequencing results of the target sites in A3A-DTL-E6, E7 (**a**) and A3A-R12I-E4, E6 (**b**). Target base editing was labeled with red arrows. **c** and **d** T-cloning and Sanger sequencing of base editing of A3A-DTL-E6, E7 (**c**) and A3A-R12I-E4, E6 (**d**). PAM sites are highlighted in green; target sequences are red. **e** Summary of multiple sites base editing by hA3A-BE3 in porcine embryos

## Supplementary Fig. 3

**a**

| Blastocysts | C to T | C to G | WT    | Ratio of base editing |
|-------------|--------|--------|-------|-----------------------|
| pol-E1      | 57.8%  | 29.5%  | 12.7  | 87.3%                 |
| pol-E2      | 70.8%  | 20.5%  | 8.7%  | 91.3%                 |
| pol-E3      | 78.9%  | 21%    | 0     | 100%                  |
| pol-E4      | 35.3%  | 11.8%  | 52.9% | 47.1%                 |
| pol-E5      | 72.9%  | 13.5%  | 13.6% | 86.4%                 |
| pol-E6      | 71.0%  | 18.0%  | 11.0% | 89.0%                 |
| pol-E7      | 42.5%  | 25.6%  | 31.9% | 68.1%                 |
| pol-E8      | 40.0%  | 22.5%  | 37.5% | 62.5%                 |
| pol-E9      | 54.2%  | 24.5%  | 21.3% | 78.7%                 |
| pol-E10     | 54.4%  | 32.6%  | 13.0% | 87.0%                 |
| pol-E11     | 48.2%  | 30.2%  | 22.6% | 78.4%                 |
| pol-E12     | 44.7%  | 20.9%  | 34.4% | 65.6%                 |
| pol-E13     | 29.5%  | 46.8%  | 23.7% | 76.3%                 |
| pol-E14     | 46.8%  | 26.3%  | 26.9% | 73.1%                 |
| pol-E15     | 55.2%  | 25.9%  | 18.9% | 81.1%                 |
| pol-E16     | 58.0%  | 17.1%  | 24.9% | 75.1%                 |
| pol-E17     | 63.9%  | 21.3%  | 14.8% | 85.2%                 |
| pol-E18     | 56.5%  | 25.3%  | 18.2% | 81.8%                 |
| pol-E19     | 65.5%  | 19.8%  | 14.7% | 85.3%                 |
| pol-E20     | 61.7%  | 16.5%  | 21.8% | 78.2%                 |

**b**

| No. of embryos injected | No. of blastocysts (%) | No. of blastocysts detected | No. of blastocysts with <i>pol</i> gene base editing (%) |
|-------------------------|------------------------|-----------------------------|----------------------------------------------------------|
| 100                     | 20 (20%)               | 20                          | 20 (100%)                                                |

**Supplementary Fig. 3 Base editing of the *pol* gene in porcine embryos. a and b** Detailed information concerning base editing efficiency of each injected porcine embryo.



# Supplementary Fig. 4

**a**

## *DTL* mutant cell colonies

---

**DMD** 5' -TTTTTTTATCTTTCAGGT**GCTTCAGGAAGACCTAGAGCAGGAACAAGTCAGGGTCAATTC**-3' **Wild-type**  
**DTL-C1:** 5' -TTTTTTTATCTTTCAGGTGCTT**TAGGAAGACCTAGAGCAGGAACAAGTCAGGGTCAATTC**-3' (Q493STOP)  
**DTL-C23:** 5' -TTTTTTTATCTTTCAGGTGCTT**TAGGAAGACCTAGAGCAGGAACAAGTCAGGGTCAATTC**-3' (Q493STOP)  
**DTL-C37:** 5' -TTTTTTTATCTTTCAGGTGCTT**TAGGAAGACCTAGAGCAGGAACAAGTCAGGGTCAATTC**-3' (Q493STOP)  
5' -TTTTTTTATCTTTCAGGTGCTT**TAGGAAGACCTAGAGCAGGAACAAGTCAGGGTCAATTC**-3' (Q493STOP)

**TYR** 5' -GAGGTGATGGGAGTCCCT**GTGGCCAGCTCTCAGGCAGGGT**TTCCTGTTCAGGACATCATTC-3' **Wild-type**  
**DTL-C1:** 5' -GAGGTGATGGGAGTCCCTGTGG**TTAG**CTCTCAGGCAGGGGTTCCTGTTCAGGACATCATTC-3' (G27G, Q28STOP)  
**DTL-C23:** 5' -GAGGTGATGGGAGTCCCTGTGGCCAGCTCTCAGGCAGGGGTTCCTGTTCAGGACATCATTC-3'  
5' -GAGGTGATGGGAGTCCCTGTGGC**TAG**CTCTCAGGCAGGGGTTCCTGTTCAGGACATCATTC-3' (Q28STOP)  
**DTL-C37:** 5' -GAGGTGATGGGAGTCCCTGTGGCCAGCTCTCAGGCAGGGGTTCCTGTTCAGGACATCATTC-3'  
5' -GAGGTGATGGGAGTCCCTGTGG**TTAG**CTCTCAGGCAGGGGTTCCTGTTCAGGACATCATTC-3' (G27G, Q28STOP)

**LMNA** 5' -AGCAGCTCGGGAGCCCAG**GTGGCCGGATCCATCTCCTCTGG**CTCCTCCGCCTCCAGTGTC-3' **Wild-type**  
**DTL-C1:** 5' -AGCAGCTCGGGAGCCCAGGTGGCCGGATCCATCTCCTCTGGCTCCTCCGCCTCCAGTGTC-3'  
5' -AGCAGCTCGGGAGCCCAGGTGGG**TGGATCCATCTCCTCTGG**CTCCTCCGCCTCCAGTGTC-3' (G609G)  
**DTL-C23:** 5' -AGCAGCTCGGGAGCCCAGGTGGCCGGATCCATCTCCTCTGGCTCCTCCGCCTCCAGTGTC-3'  
5' -AGCAGCTCGGGAGCCCAGGTGGG**TGGATCCATCTCCTCTGG**CTCCTCCGCCTCCAGTGTC-3' (G609G)  
**DTL-C37:** 5' -AGCAGCTCGGGAGCCCAGGTGGG**TGGATCCATCTCCTCTGG**CTCCTCCGCCTCCAGTGTC-3' (G609G)  
5' -AGCAGCTCGGGAGCCCAGGTGGG**TGGATCCATCTCCTCTGG**CTCCTCCGCCTCCAGTGTC-3' (G609G)

---

**b**

## *R12I* mutant cell colonies

---

**RAG1** 5' -AGGGGAAACCCCTCGCT**GGAGCAATCTCCAGCAGTCC**TGGACAAGCCTGGTGGTCAGAAGTCAGC-3' **Wild-type**  
**R12I-C22** 5' -AGGGGAAACCCCTCGCTGGAGT**TAAT**CTCCAGCAGTCTGGACAAGCCTGGTGGTCAGAAGTCAGC-3' (Q61STOP)  
**R12I-C29** 5' -AGGGGAAACCCCTCGCTGGAGCAATCTCCAGCAGTCTGGACAAGCCTGGTGGTCAGAAGTCAGC-3' Wild-type  
**R12I-C56** 5' -AGGGGAAACCCCTCGCTGGAGCAATCTCCAGCAGTCTGGACAAGCCTGGTGGTCAGAAGTCAGC-3' Wild-type  
**R12I-C108** 5' -AGGGGAAACCCCTCGCTGGAGCAATCTCCAGCAGTCTGGACAAGCCTGGTGGTCAGAAGTCAGC-3' Wild-type  
5' -AGGGGAAACCCCTCGCTGGAGT**TAAT**CTCCAGCAGTCTGGACAAGCCTGGTGGTCAGAAGTCAGC-3' (Q61STOP)

**RAG2** 5' -CCCACGTGCAGAAAAT**GTCACTACAGATGATAACAGT**TGGTAATAACATGGCCTTAATTCAGCC-3' **Wild-type**  
**R12I-C22** 5' -CCCACGTGCAGAAAATGT**CAATTA**AGATGATAACAGTTGGTAATAACATGGCCTTAATTCAGCC-3' (L3L, Q4K)  
5' -CCCACGTGCAGAAAATGT**TATTAT**AGATGATAACAGTTGGTAATAACATGGCCTTAATTCAGCC-3' (S2L, L3L, Q4STOP)  
**R12I-C29** 5' -CCCACGTGCAGAAAATGT**TACTAC**AGATGATAACAGTTGGTAATAACATGGCCTTAATTCAGCC-3' (S2L)  
5' -CCCACGTGCAGAAAATGT**TATTAC**AGATGATAACAGTTGGTAATAACATGGCCTTAATTCAGCC-3' (S2L, L3L)  
**R12I-C56** 5' -CCCACGTGCAGAAAATGT**TATTAC**AGATGATAACAGTTGGTAATAACATGGCCTTAATTCAGCC-3' (S2L, L3L)  
5' -CCCACGTGCAGAAAATGT**TATTAT**AGATGATAACAGTTGGTAATAACATGGCCTTAATTCAGCC-3' (S2L, L3L, Q4STOP)  
**R12I-C108** 5' -CCCACGTGCAGAAAATGT**TATTAT**AGATGATAACAGTTGGTAATAACATGGCCTTAATTCAGCC-3' (S2L, L3L, Q4STOP)

**IL2RG** 5' -CTACCAAACATTTGTT**GTCAGCTCCAGGACCCACGG**AACCCAGGAGGCAGGACCCACAGACG-3' **Wild-type**  
**R12I-C22** 5' -CTACCAAACATTTGTTGTT**TAG**CTCCAGGACCCACGGGAACCCAGGAGGCAGGACCCACAGACG-3' (V154V, Q155STOP)  
**R12I-C29** 5' -CTACCAAACATTTGTTGTTCCAGCTCCAGGACCCACGGGAACCCAGGAGGCAGGACCCACAGACG-3' Wild-type  
5' -CTACCAAACATTTGTTGTT**TAG**CTCCAGGACCCACGGGAACCCAGGAGGCAGGACCCACAGACG-3' (V154V, Q155STOP)  
**R12I-C56** 5' -CTACCAAACATTTGTTGTTCCAGCTCCAGGACCCACGGGAACCCAGGAGGCAGGACCCACAGACG-3' Wild-type  
5' -CTACCAAACATTTGTTGTT**TAG**CT**TTAG**GACCCACGGGAACCCAGGAGGCAGGACCCACAGACG-3' (V154V, Q155STOP, L156L, Q157STOP)  
**R12I-C108** 5' -CTACCAAACATTTGTTGTT**TAG**CTCCAGGACCCACGGGAACCCAGGAGGCAGGACCCACAGACG-3' (V154V, Q155STOP)

---

Supplementary Fig. 4 Simultaneous base editing of *DMD*, *TYR*, and *LMNA* or *RAG1*, *RAG2*, and *IL2RG* genes in porcine fibroblast cells. **a** and **b** T-cloning and Sanger sequencing of base editing of *DMD*, *TYR*, and *LMNA* in individual cell colony 1#, 23#, 37# (**a**), and *RAG1*, *RAG2*, and *IL2RG* in cell colony 22#, 29#, 56#, 108# (**b**).

# Supplementary Fig. 5

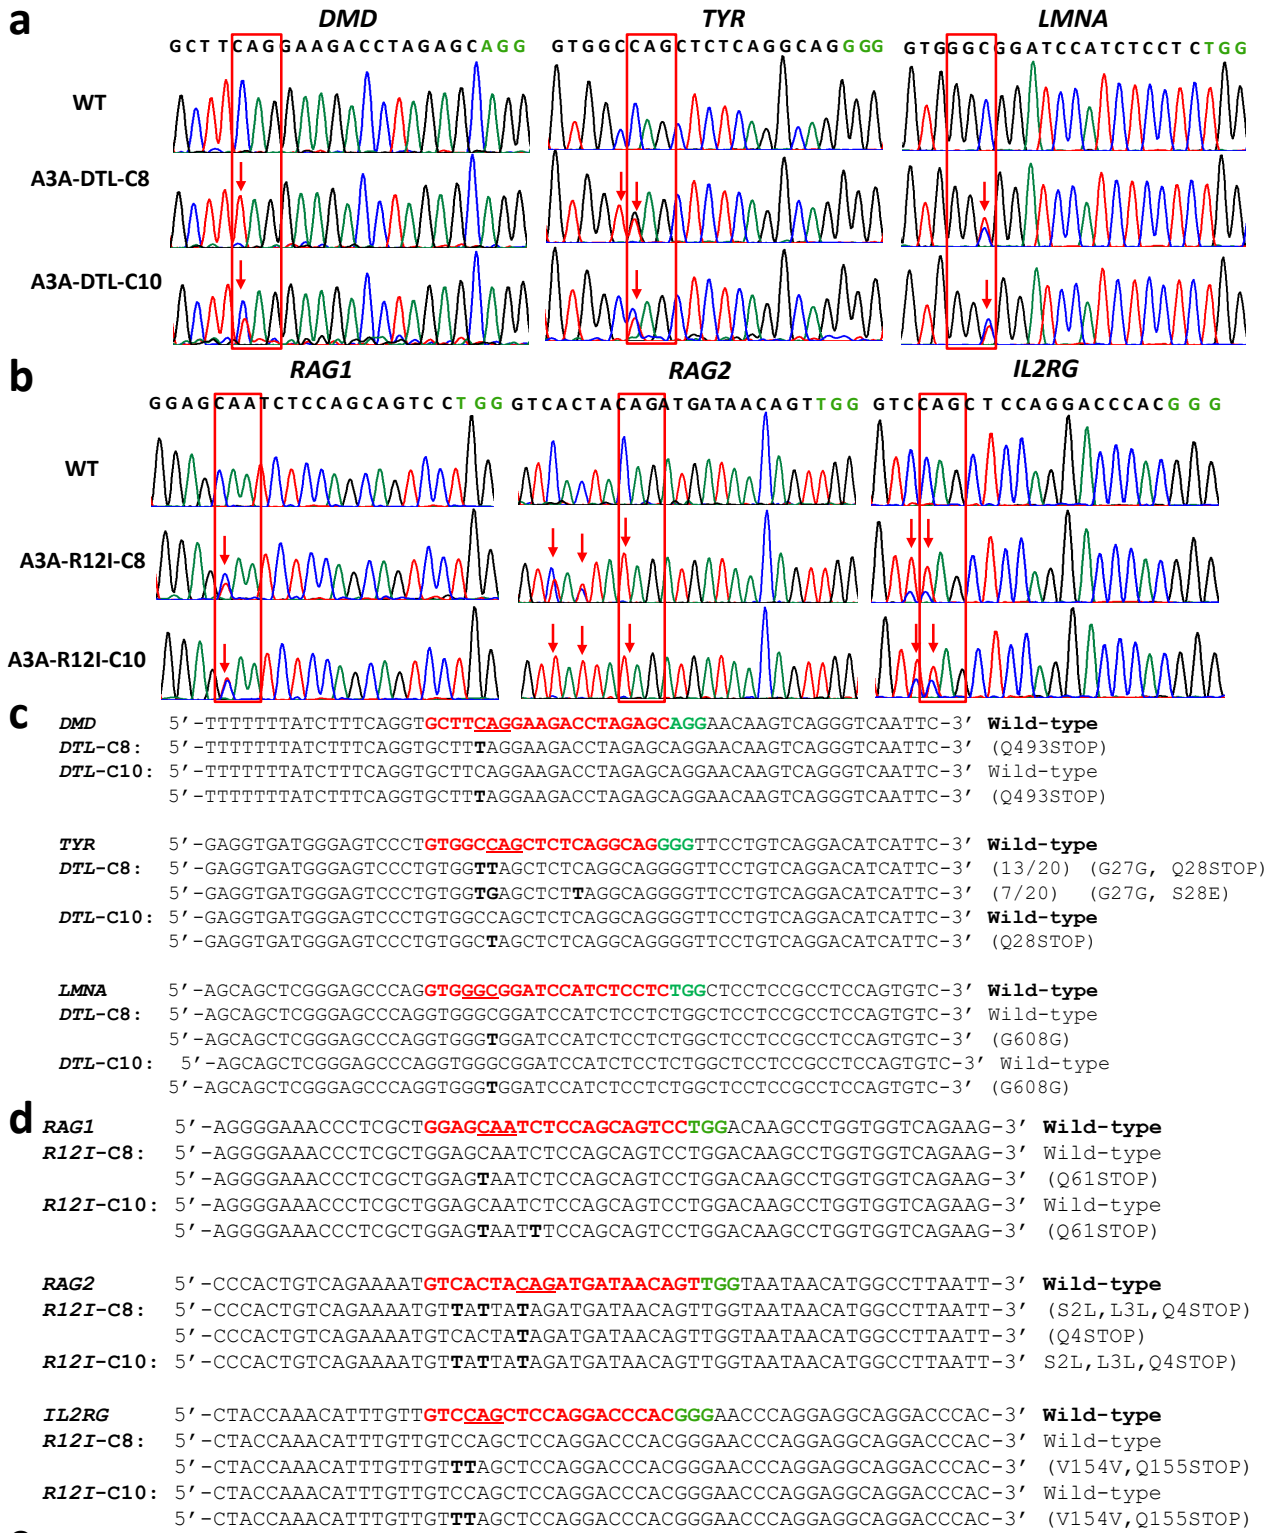

**e**

| No. of screened colonies | No. of colonies with single gene base editing (%) |          |         | No. of colonies with two genes base editing (%) |                |                | No. of colonies with three genes base editing (%) |
|--------------------------|---------------------------------------------------|----------|---------|-------------------------------------------------|----------------|----------------|---------------------------------------------------|
|                          | DMD                                               | TYR      | LMNA    | DMD and TYR                                     | TYR and LMNA   | DMD and LMNA   | DMD, TYR and LMNA                                 |
| 20                       | 0                                                 | 0        | 0       | 1 (5.0)                                         | 1 (5.0)        | 3 (15.0)       | 11 (55.0)                                         |
| 20                       | RAG1                                              | RAG2     | IL2RG   | RAG1 and RAG2                                   | RAG1 and IL2RG | RAG2 and IL2RG | RAG1, RAG2 and IL2RG                              |
|                          | 2 (10.0)                                          | 2 (10.0) | 1 (5.0) | 0                                               | 0              | 2 (10.0)       | 8 (40.0)                                          |

Supplementary Fig. 5 hA3A-BE3-mediated multiple genes base editing in porcine somatic cells. **a** and **b** Sanger sequencing results of the target sites in cell colony A3A-DTL-C8, C10 (**a**) and A3A-R12I-C8, C10 (**b**). **c** and **d** T-cloning and Sanger sequencing of base editing of A3A-DTL-C8, C10 (**c**) and A3A-R12I-C8, C10 (**d**). **e** Summary of multiple sites base editing by hA3A-BE3 in porcine somatic cells

## Supplementary Fig. 6

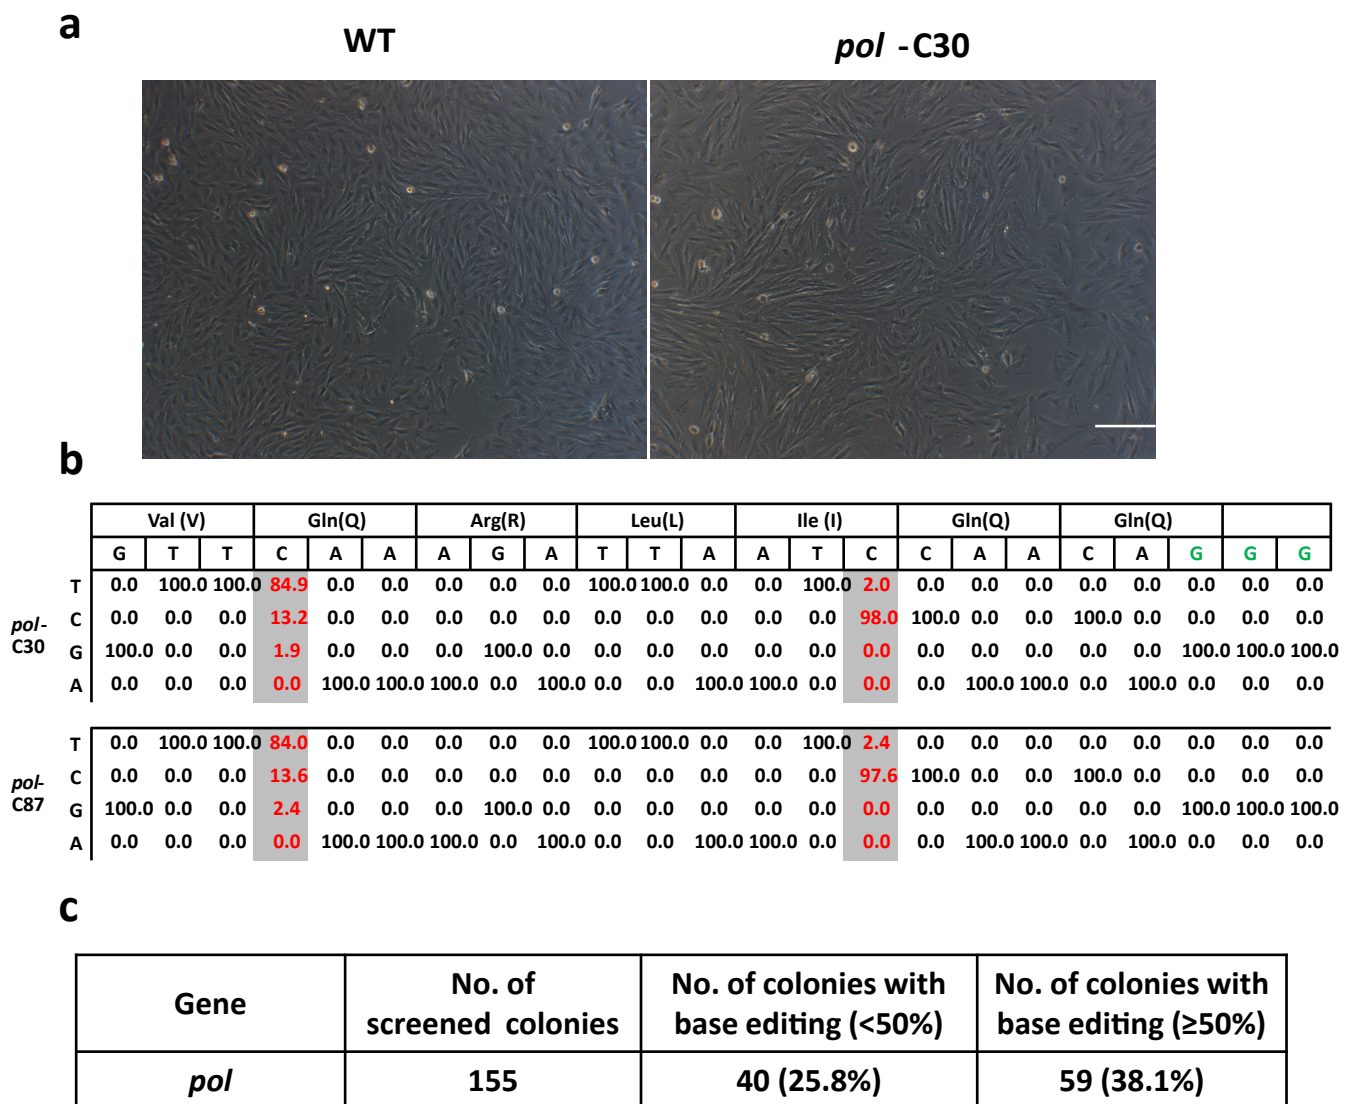

**Supplementary Fig. 4 Base editing of the *pol* gene in porcine somatic cells. a** Photograph of selected *pol*-inactivated and WT colony. Scale bars: 20  $\mu$ m. **b** Summary of the deep sequencing of the on-target sites of the *pol* gene in cell colony 30# and 87#. **c** Summary of base editing efficiency of selected cell colonies.

## Supplementary Fig. 7

*LMNA*<sup>+/+</sup>

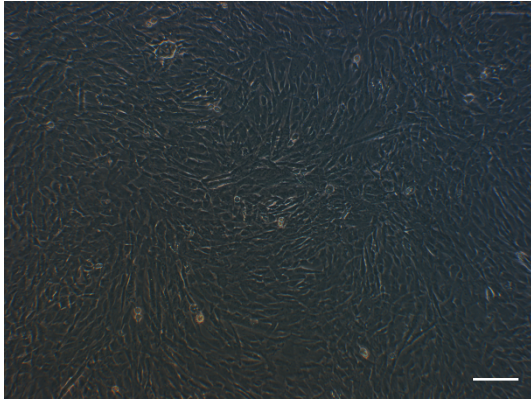

*LMNA*<sup>G608G/+</sup>

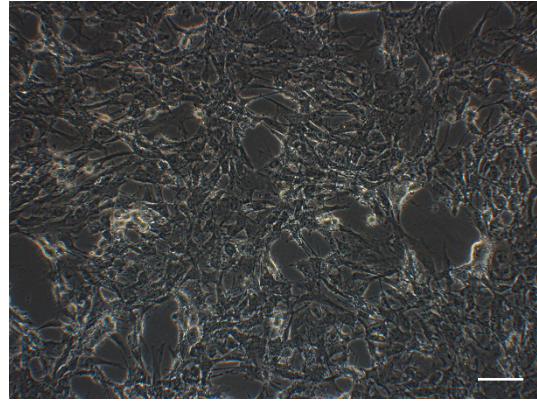

**Supplementary Fig. 7 Photographs of the *LMNA*<sup>+/+</sup> and *LMNA*<sup>G608G/+</sup> cell colonies.** *LMNA*<sup>G608G/+</sup> cell colony exhibited premature senescence phenotypes. Scale bars: 20  $\mu$ m.

## Supplementary Fig. 8

G608G

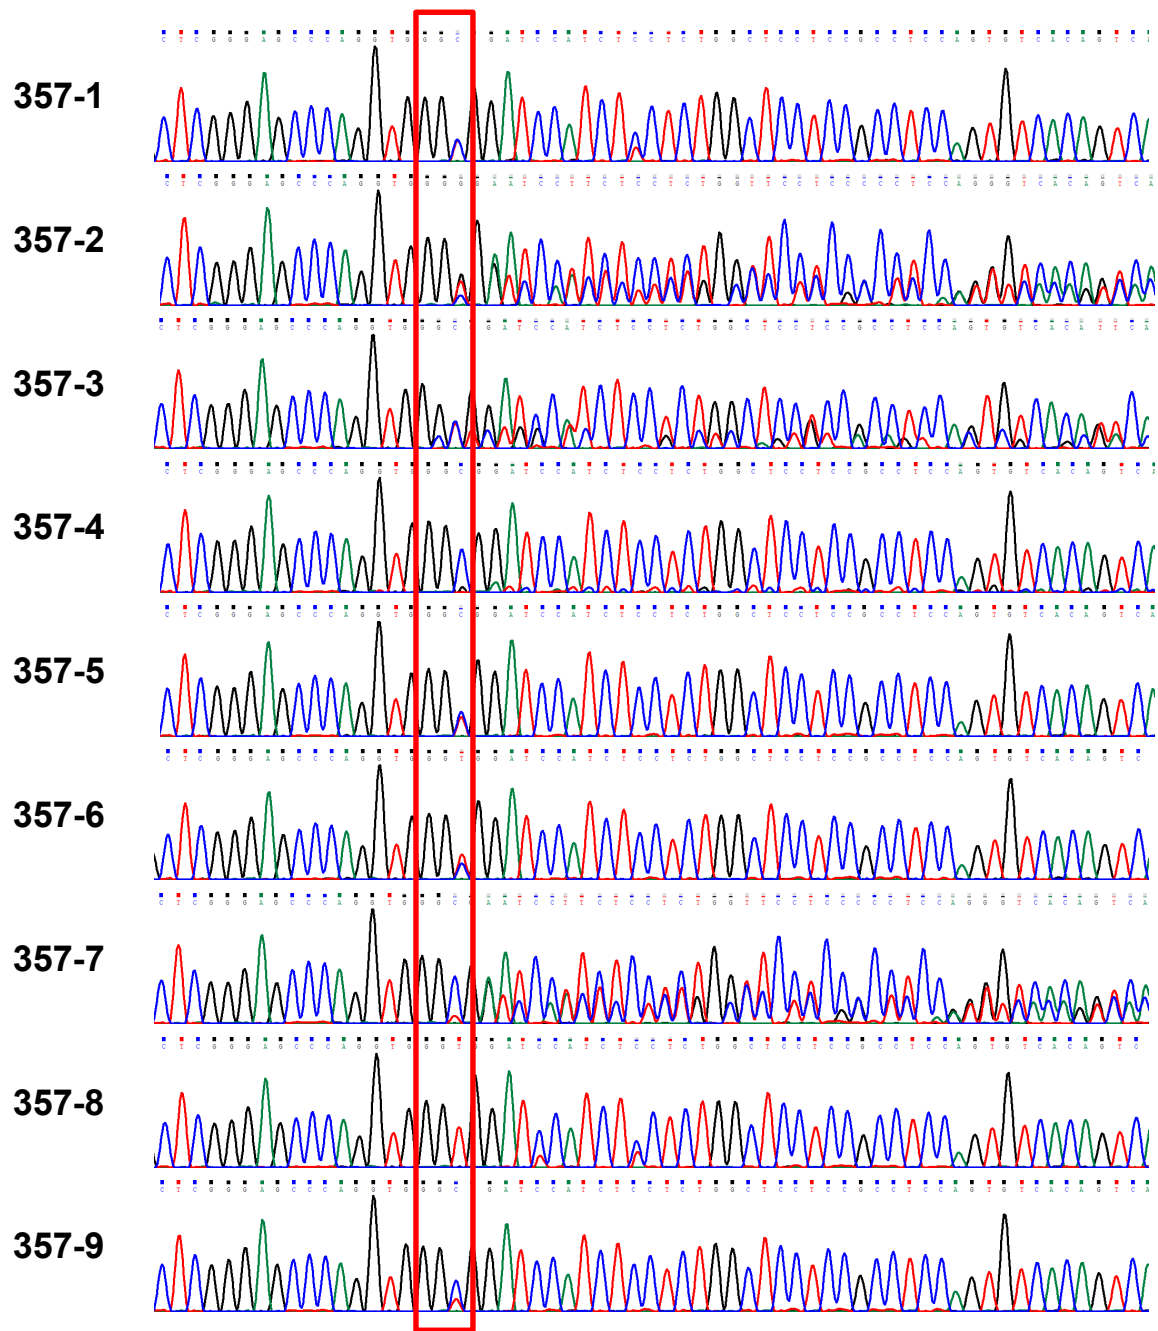

Supplementary Fig. 8 Sanger sequencing results of *LMNA*<sup>G608G</sup> mutant piglets



**Supplementary Fig. 9**

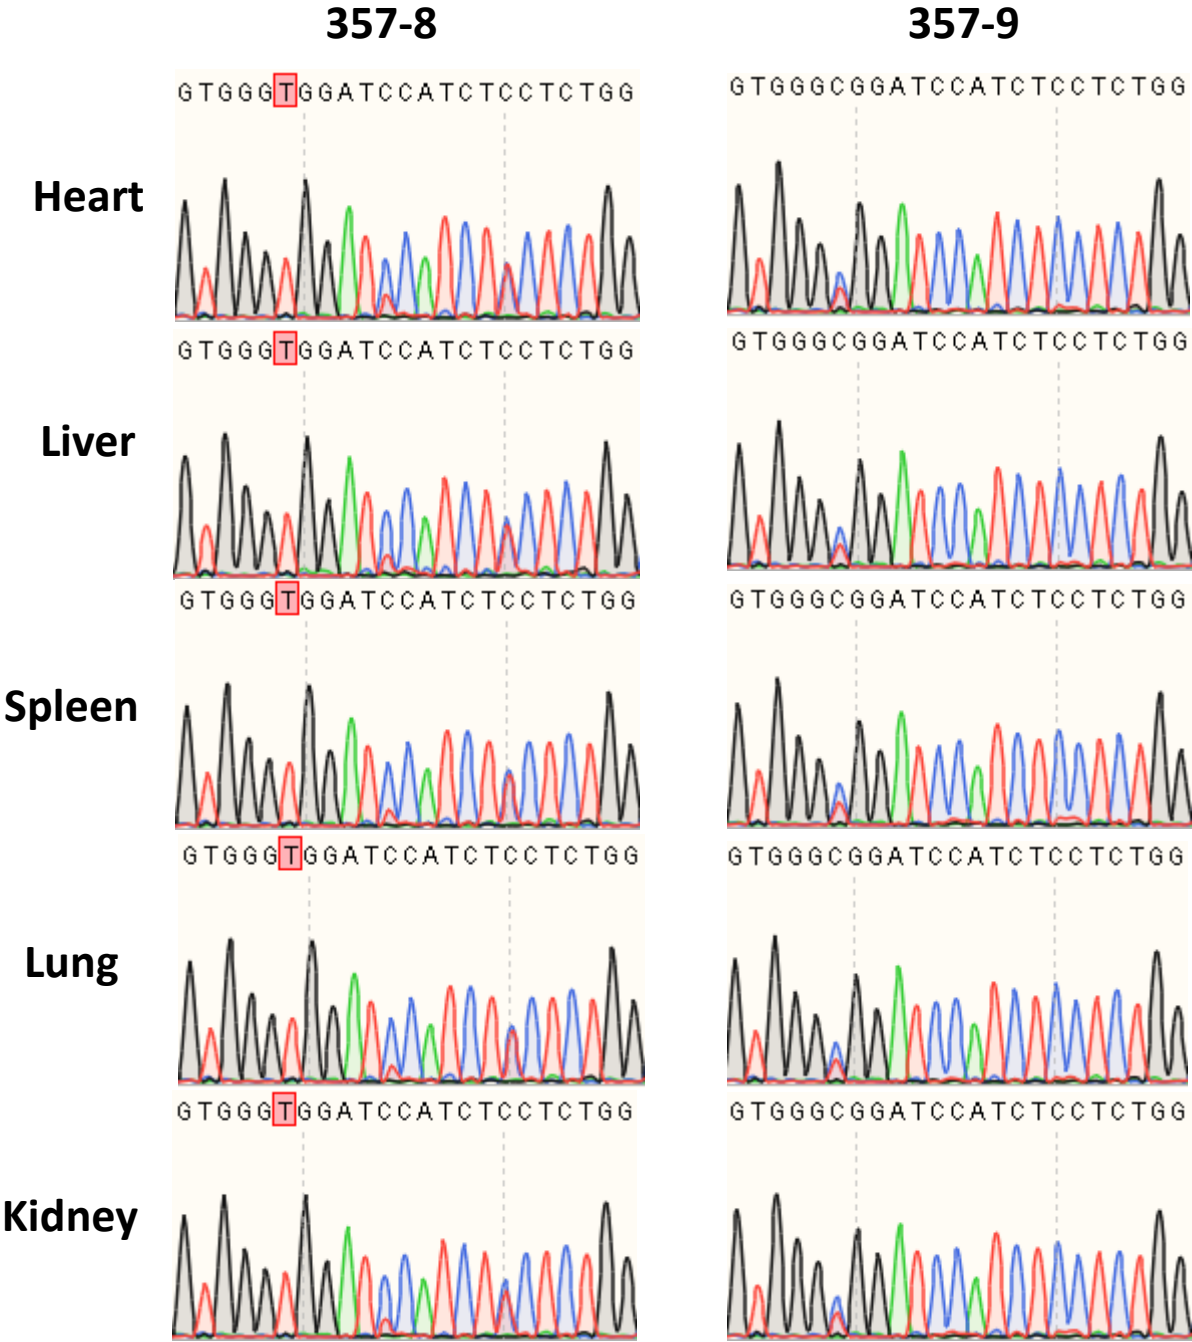

**Supplementary Fig. 9 *LMNA* c.1824C > T mutations in the heart, liver, spleen, lung and kidney of 357-8 and 357-9 piglets were detected by Sanger sequencing**

# Supplementary Fig. 10

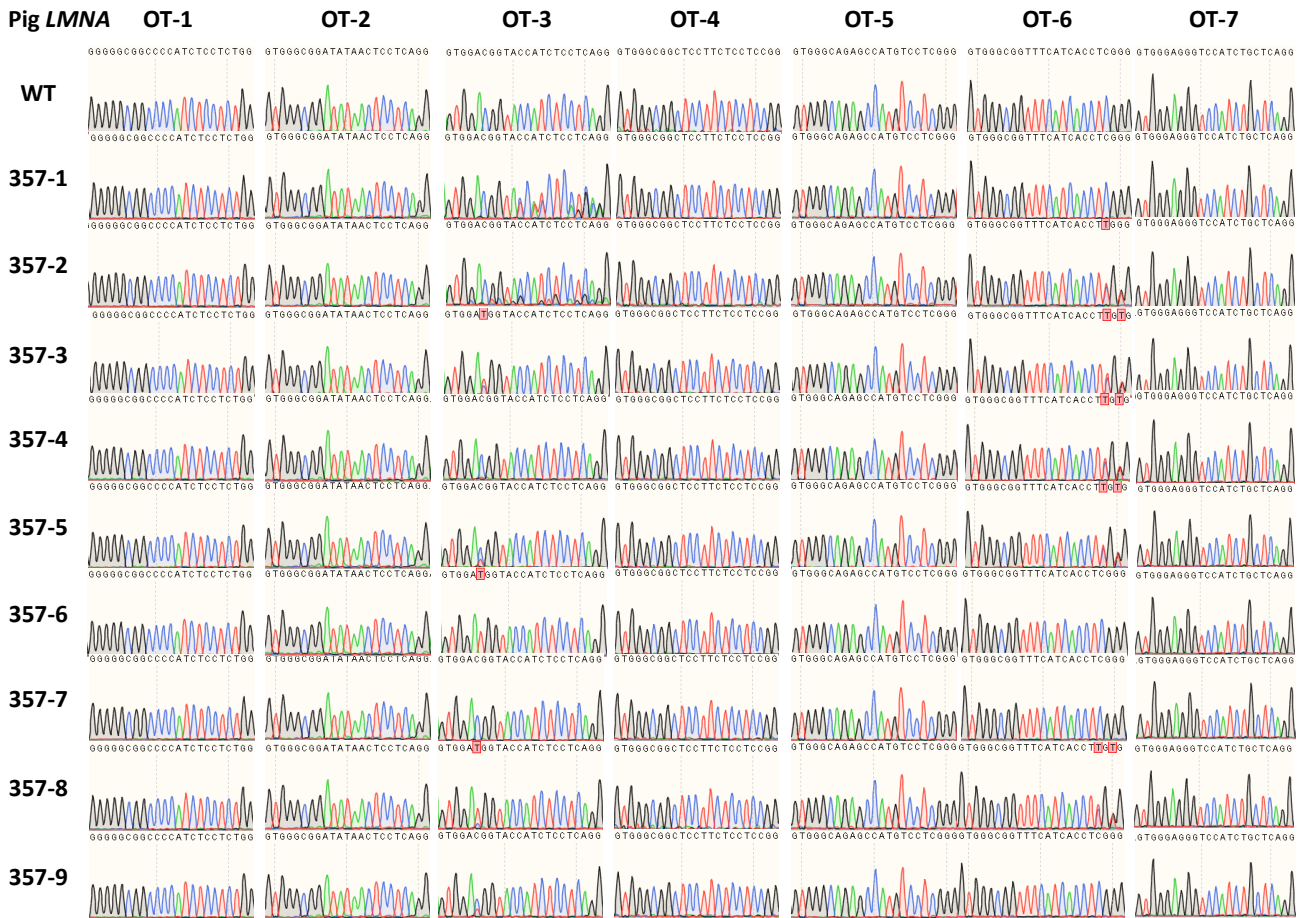

**Supplementary Fig. 15 Off-target analysis of *LMNA*<sup>G608G</sup> mutant piglets.**

# Supplementary Fig. 11

## *DMD* mutant colonies

---

TTTTTATCTTTCAGGTGCTTCAGGAAGACCTAGAGCAGGAACAAGTCAGGGTCAATTCTCTCAC **Wild-type**

**DMD-C3:** TTTTTATCTTTCAGGT-----GCAGGAACAAGTCAGGGTCAATTCTCTCAC ( $\Delta 18$ )  
TTTTTATCTTTCAGGTGCTTTAGGAAGACCTAGAGCAGGAACAAGTCAGGGTCAATTCTCTCAC (Q493STOP)

**DMD-C17:** TTTTTATCTTTCAGGTGCTTCAGGAAGACCTAGAGCAGGAACAAGTCAGGGTCAATTCTCTCAC Wild-type  
TTTTTATCTTTCAGGTGCTTTAGGAAGACCTAGAGCAGGAACAAGTCAGGGTCAATTCTCTCAC (Q493STOP)

**DMD-C36:** TTTTTATCTTTCAGGT-----GCAGGAACAAGTCAGGGTCAATTCTCTCAC ( $\Delta 18$ )  
TTTTTATCTTTCAGGTGCTTTAGGAAGACCTAGAGCAGGAACAAGTCAGGGTCAATTCTCTCAC (Q493STOP)

**DMD-C59:** TTTTTATCTTTCAGGT-----GCAGGAACAAGTCAGGGTCAATTCTCTCAC ( $\Delta 18$ )  
TTTTTATCTTTCAGGTGCTTTAGGAAGACCTAGAGCAGGAACAAGTCAGGGTCAATTCTCTCAC (Q493STOP)

**DMD-C67:** TTTTTATCTTTCAGGTGCTTCAGGAAGACCTAGAGCAGGAACAAGTCAGGGTCAATTCTCTCAC Wild-type  
TTTTTATCTTTCAGGTGCTTTAGGAAGACCTAGAGCAGGAACAAGTCAGGGTCAATTCTCTCAC (Q493STOP)

**DMD-C87:** TTTTTATCTTTCAGGT-----GCAGGAACAAGTCAGGGTCAATTCTCTCAC ( $\Delta 18$ )  
TTTTTATCTTTCAGGTGCTTTAGGAAGACCTAGAGCAGGAACAAGTCAGGGTCAATTCTCTCAC (Q493STOP)

**DMD-C92:** TTTTTATCTTTCAGGTGCTTCAGGAAGACCTAGAGCAGGAACAAGTCAGGGTCAATTCTCTCAC Wild-type  
TTTTTATCTTTCAGGTGCTTTAGGAAGACCTAGAGCAGGAACAAGTCAGGGTCAATTCTCTCAC (Q493STOP)

---

**Supplementary Fig. 11 Genotype of selected cell colonies for SCNT to generate *DMD* heterozygous piglets.**



## Supplementary Fig. 12

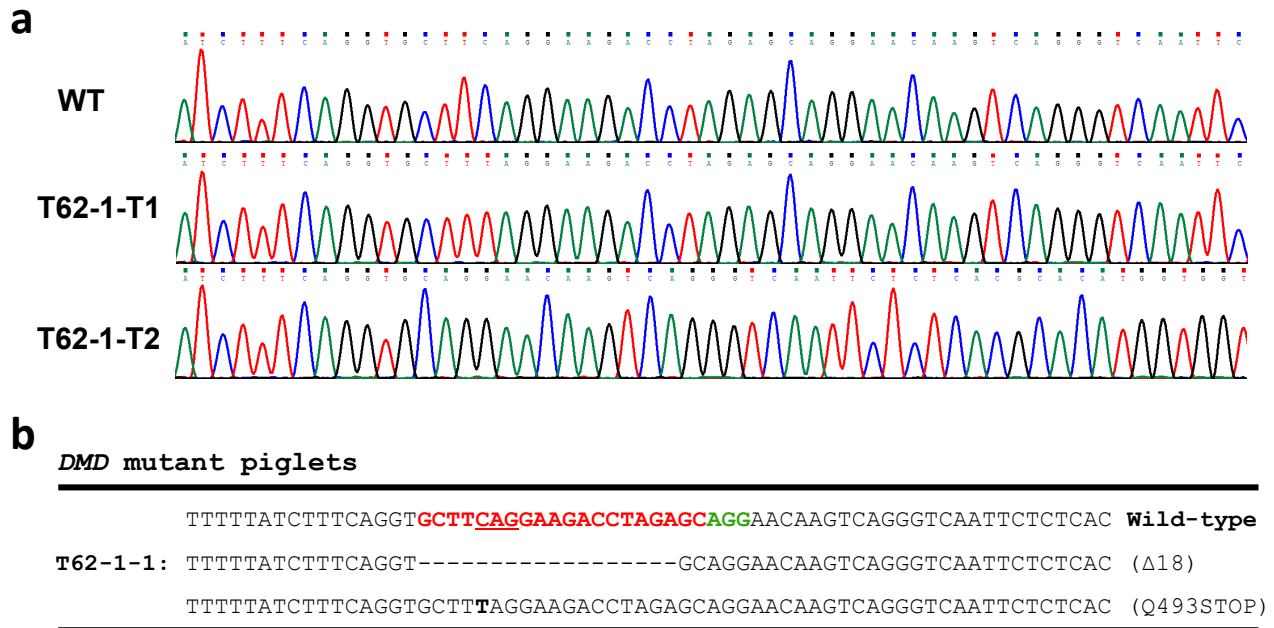

**Supplementary Fig. 12 Genotype of newborn *DMD* mutant piglet. a and b T-cloning and Sanger sequencing of base editing of *DMD* in newborn T62-1-1 piglet.**

## Supplementary Fig. 13

### *R12I* mutant piglets

---

*RAG1* 5' -AGGGGAAACCTCGCTGGAGCAATCTCCAGCAGTCCTGGACAAGCCTGGTGGTCAGAAGTCAGC-3' Wild-type  
A632-1 5' -AGGGGAAACCTCGCTGGAGTAATCTCCAGCAGTCCTGGACAAGCCTGGTGGTCAGAAGTCAGC-3' Q61STOP  
A632-2 5' -AGGGGAAACCTCGCTGGAGCAATCTCCAGCAGTCCTGGACAAGCCTGGTGGTCAGAAGTCAGC-3' Wild-type  
5' -AGGGGAAACCTCGCTGGAGTAATCTCCAGCAGTCCTGGACAAGCCTGGTGGTCAGAAGTCAGC-3' (Q61STOP)  
A632-3 5' -AGGGGAAACCTCGCTGGAGCAATCTCCAGCAGTCCTGGACAAGCCTGGTGGTCAGAAGTCAGC-3' Wild-type  
A633-1 5' -AGGGGAAACCTCGCTGGAGCAATCTCCAGCAGTCCTGGACAAGCCTGGTGGTCAGAAGTCAGC-3' Wild-type  
A633-2 5' -AGGGGAAACCTCGCTGGAGCAATCTCCAGCAGTCCTGGACAAGCCTGGTGGTCAGAAGTCAGC-3' Wild-type

*RAG2* 5' -CCCCTGTTCAGAAAATGTCACACTACAGATGATAACAGTTGGTAATAACATGGCCTTAATTCAGCC-3' Wild-type  
A632-1 5' -CCCCTGTTCAGAAAATGTCATTAAGATGATAACAGTTGGTAATAACATGGCCTTAATTCAGCC-3' L3L, Q4K  
5' -CCCCTGTTCAGAAAATGTTATTAATAGATGATAACAGTTGGTAATAACATGGCCTTAATTCAGCC-3' S2L, L3L, Q4STOP  
A632-2 5' -CCCCTGTTCAGAAAATGTTATTAATAGATGATAACAGTTGGTAATAACATGGCCTTAATTCAGCC-3' S2L, L3L, Q4STOP  
A632-3 5' -CCCCTGTTCAGAAAATGTTACTACAGATGATAACAGTTGGTAATAACATGGCCTTAATTCAGCC-3' S2L  
5' -CCCCTGTTCAGAAAATGTTATTAACAGATGATAACAGTTGGTAATAACATGGCCTTAATTCAGCC-3' S2L, L3L  
A633-1 5' -CCCCTGTTCAGAAAATGTTATTAACAGATGATAACAGTTGGTAATAACATGGCCTTAATTCAGCC-3' S2L, L3L  
5' -CCCCTGTTCAGAAAATGTTATTAATAGATGATAACAGTTGGTAATAACATGGCCTTAATTCAGCC-3' S2L, L3L, Q4STOP  
A633-2 5' -CCCCTGTTCAGAAAATGTTATTAACAGATGATAACAGTTGGTAATAACATGGCCTTAATTCAGCC-3' S2L, L3L  
5' -CCCCTGTTCAGAAAATGTTATTAATAGATGATAACAGTTGGTAATAACATGGCCTTAATTCAGCC-3' S2L, L3L, Q4STOP

*IL2RG* 5' -CTACCAAACATTTGTTGTCCAGCTCCAGGACCCACGGGAACCCAGGAGGCAGGACCCACAGACG-3' Wild-type  
A632-1 5' -CTACCAAACATTTGTTGTTTAGCTCCAGGACCCACGGGAACCCAGGAGGCAGGACCCACAGACG-3' V154V, Q155STOP  
A632-2 5' -CTACCAAACATTTGTTGTTTAGCTCCAGGACCCACGGGAACCCAGGAGGCAGGACCCACAGACG-3' V154V, Q155STOP  
A632-3 5' -CTACCAAACATTTGTTGTCCAGCTCCAGGACCCACGGGAACCCAGGAGGCAGGACCCACAGACG-3' Wild-type  
5' -CTACCAAACATTTGTTGTTTAGCTCCAGGACCCACGGGAACCCAGGAGGCAGGACCCACAGACG-3' V154V, Q155STOP  
A633-1 5' -CTACCAAACATTTGTTGTCCAGCTCCAGGACCCACGGGAACCCAGGAGGCAGGACCCACAGACG-3' Wild-type  
5' -CTACCAAACATTTGTTGTTTAGCTTTAGGACCCACGGGAACCCAGGAGGCAGGACCCACAGACG-3' V154V, Q155STOP, L156L, Q157STOP  
A633-2 5' -CTACCAAACATTTGTTGTCCAGCTCCAGGACCCACGGGAACCCAGGAGGCAGGACCCACAGACG-3' Wild-type  
5' -CTACCAAACATTTGTTGTTTAGCTTTAGGACCCACGGGAACCCAGGAGGCAGGACCCACAGACG-3' V154V, Q155STOP, L156L, Q157STOP

---

Supplementary Fig. 13 Genotype of newborn *RAG1*, *RAG2*, and *IL2RG* mutant piglets.

# Supplementary Fig. 14

## DMD

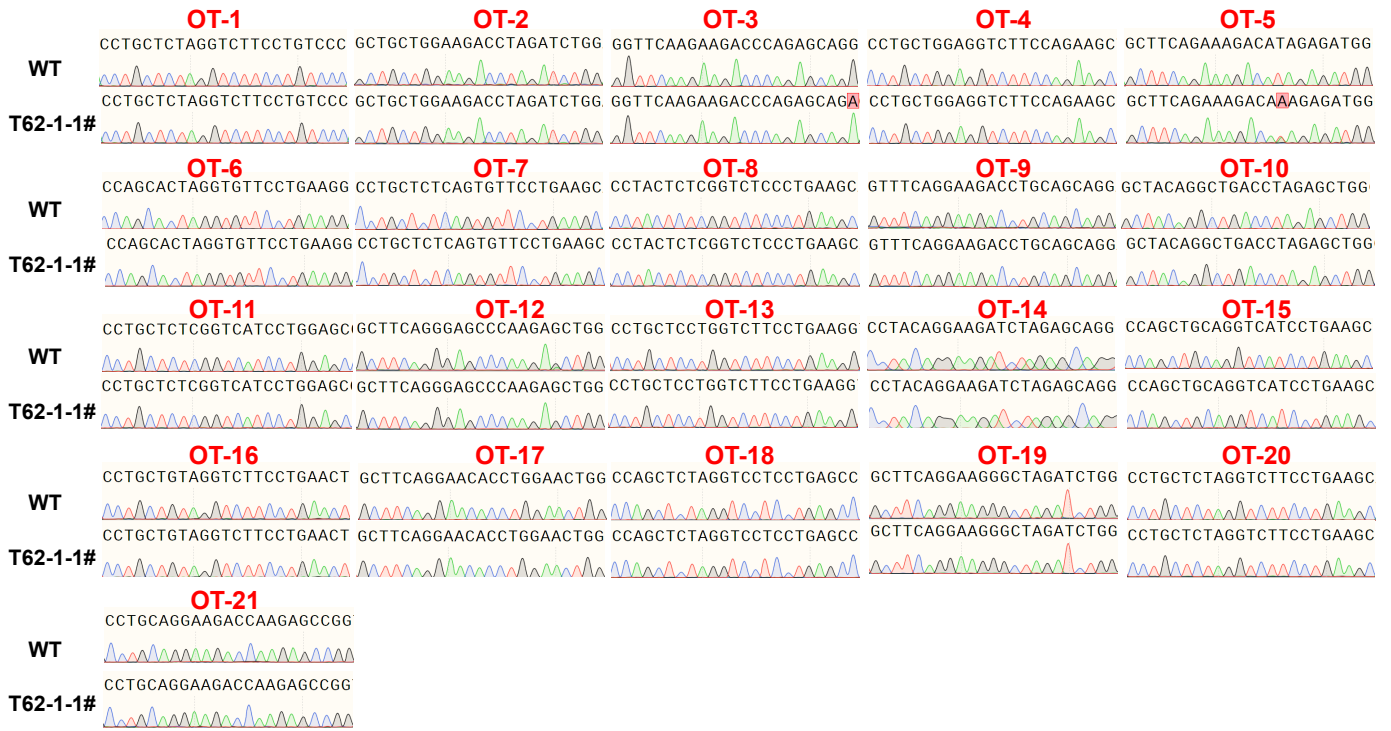

Supplementary Fig. 14 Off-target analysis of *DMD* mutant piglet (T62-1-1).

# Supplementary Fig. 15

## RAG1

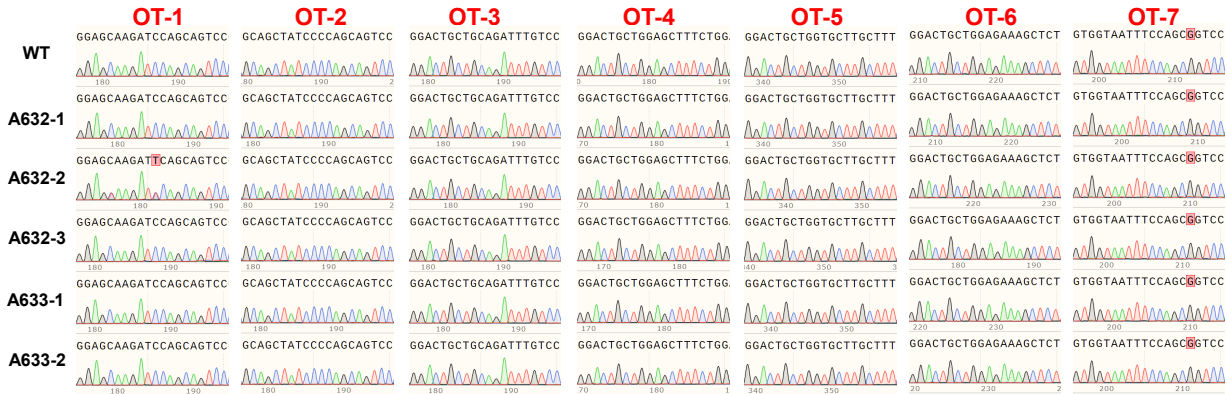

## RAG2

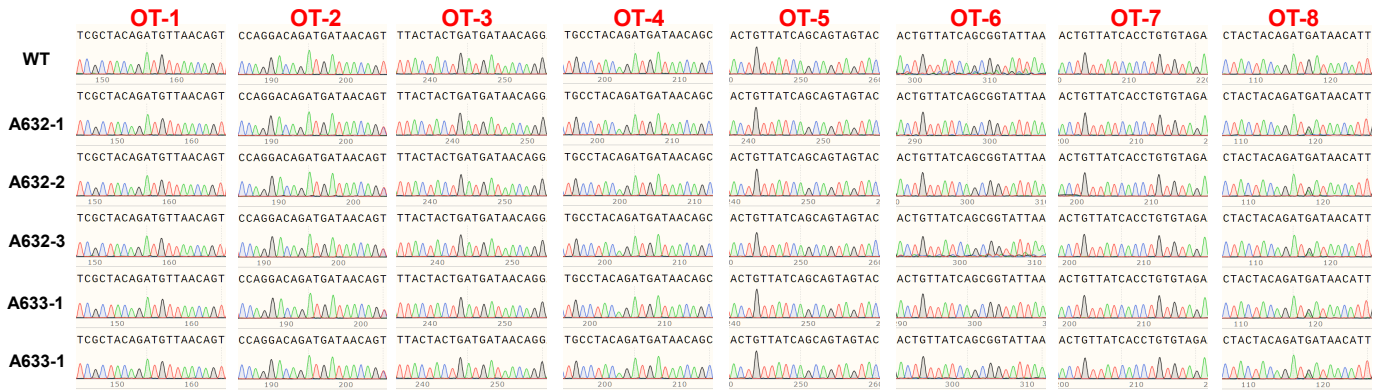

## IL2RG

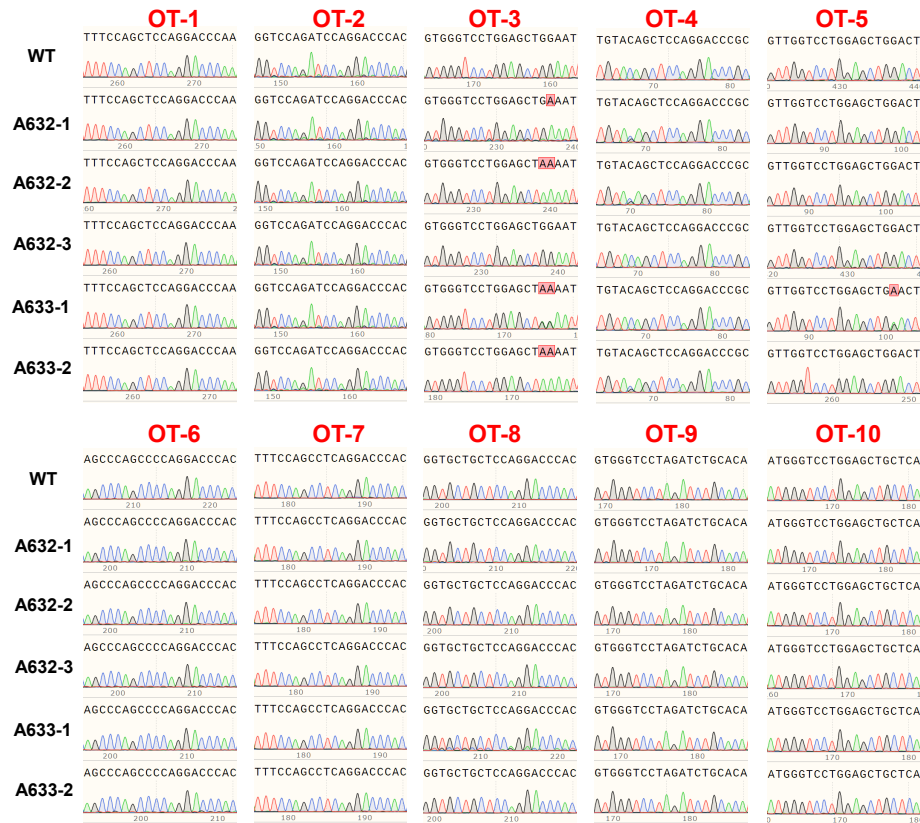

Supplementary Fig. 15 Off-target analysis of *RAG1*, *RAG2*, and *IL2RG* mutant piglets.

## Supplementary Fig. 16

**A632-1**

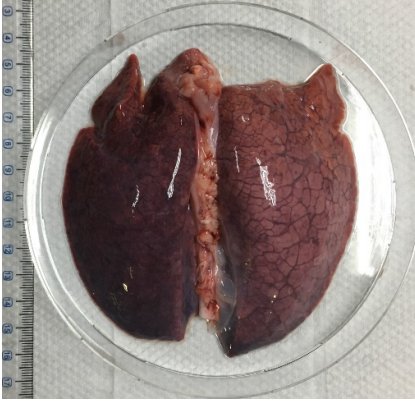

**A633-1**

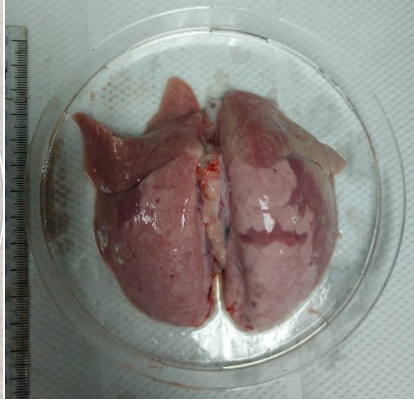

**A633-2**

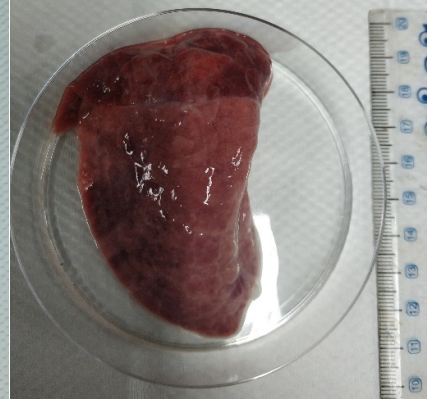

**Supplementary Fig. 16 Photographs of the lungs from piglets A632-1, A633-1, and A633-2, died 49, 41, and 74 days after birth.**

## Supplementary Fig. 17

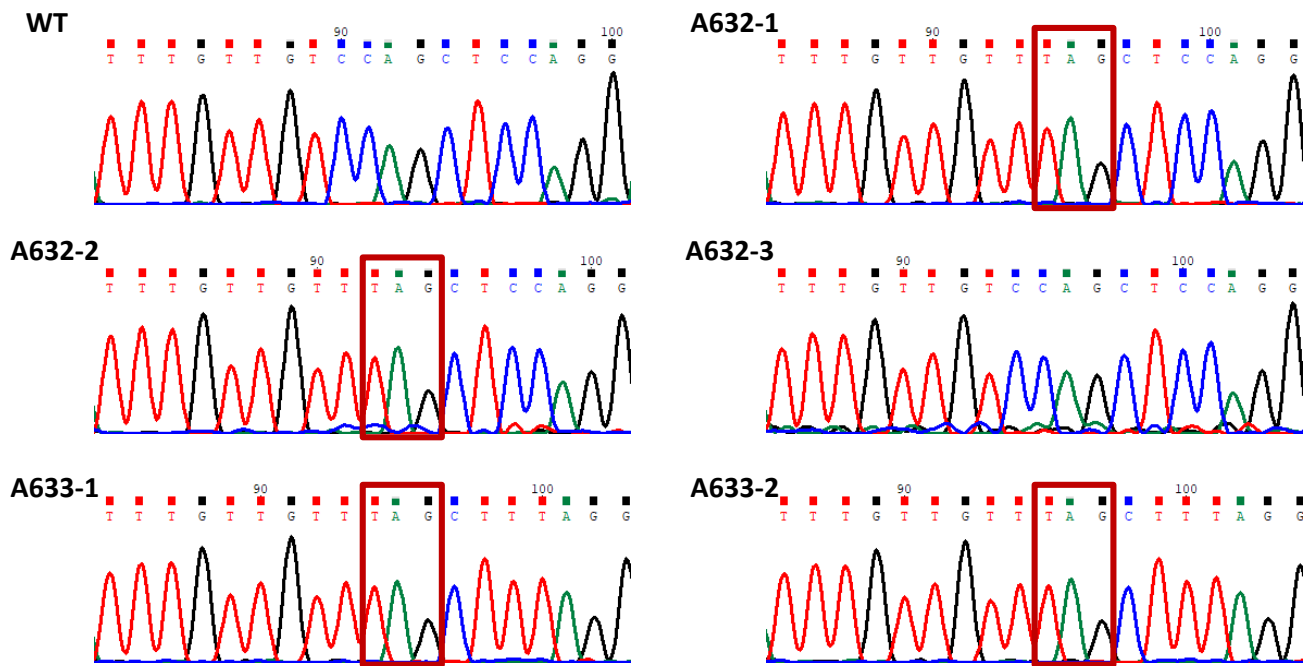

Supplementary Fig. 17 RT-PCR and Sanger sequencing of *IL2RG* mRNA in peripheral blood of A632-1, A632-2, A632-3, A633-1, A633-2, and WT piglets.
